# Supplementary material for: An engineered cell-imprinted substrate directs osteogenic differentiation in stem cells
Source: Royal Society of Chemistry journal article supplement (doi:10.1039/c7bm00733g), 2017-11-20
Supplement: c7bm00733g1.pdf [file c7bm00733g1.pdf]

**Supporting Information for**

**Engineered Cell-Imprinted Substrate Directs Osteogenic**

**Differentiation in Stem Cells**

Khorshid Kamguyan <sup>ab</sup>, Ali Asghar Katbab <sup>a\*</sup>, Morteza Mahmoudi <sup>c</sup>, Esben Thormann <sup>d</sup>, Saeed  
Zajforoushan Moghaddam <sup>d</sup>, Lida Moradi <sup>e</sup>, Shahin Bonakdar <sup>b\*</sup>

<sup>a</sup> Department of Polymer Engineering and Color Technology, Amirkabir University of Technology,  
Tehran, 1599637111, Iran

<sup>b</sup> National Cell Bank of Iran, Pasteur Institute of Iran, 1316943551, Tehran, Iran

<sup>c</sup> Department of Anesthesiology, Brigham and Women's Hospital, Harvard Medical School, Boston,  
Massachusetts 02115, United States

<sup>d</sup> Department of Chemistry, Technical University of Denmark, 2800 Kgs. Lyngby, Denmark

<sup>e</sup> Pediatric Urology and Regenerative Medicine Research Center, Children's Medical Center,  
Tehran University of Medical sciences, 1417613151, Tehran, Iran

---

\* Corresponding author: Tel.: +98 21 644 18107; Fax: +98 21 664 69162. katbab@aut.ac.ir, (A.A. Katbab).

Tel. +98 21 66953311; Fax +98 21 66465132. sh\_bonakdar@pasteur.ac.ir, (Sh. Bonakdar).

### S1. Additional SEM Images of the Cell-imprinted PDMS Substrates.

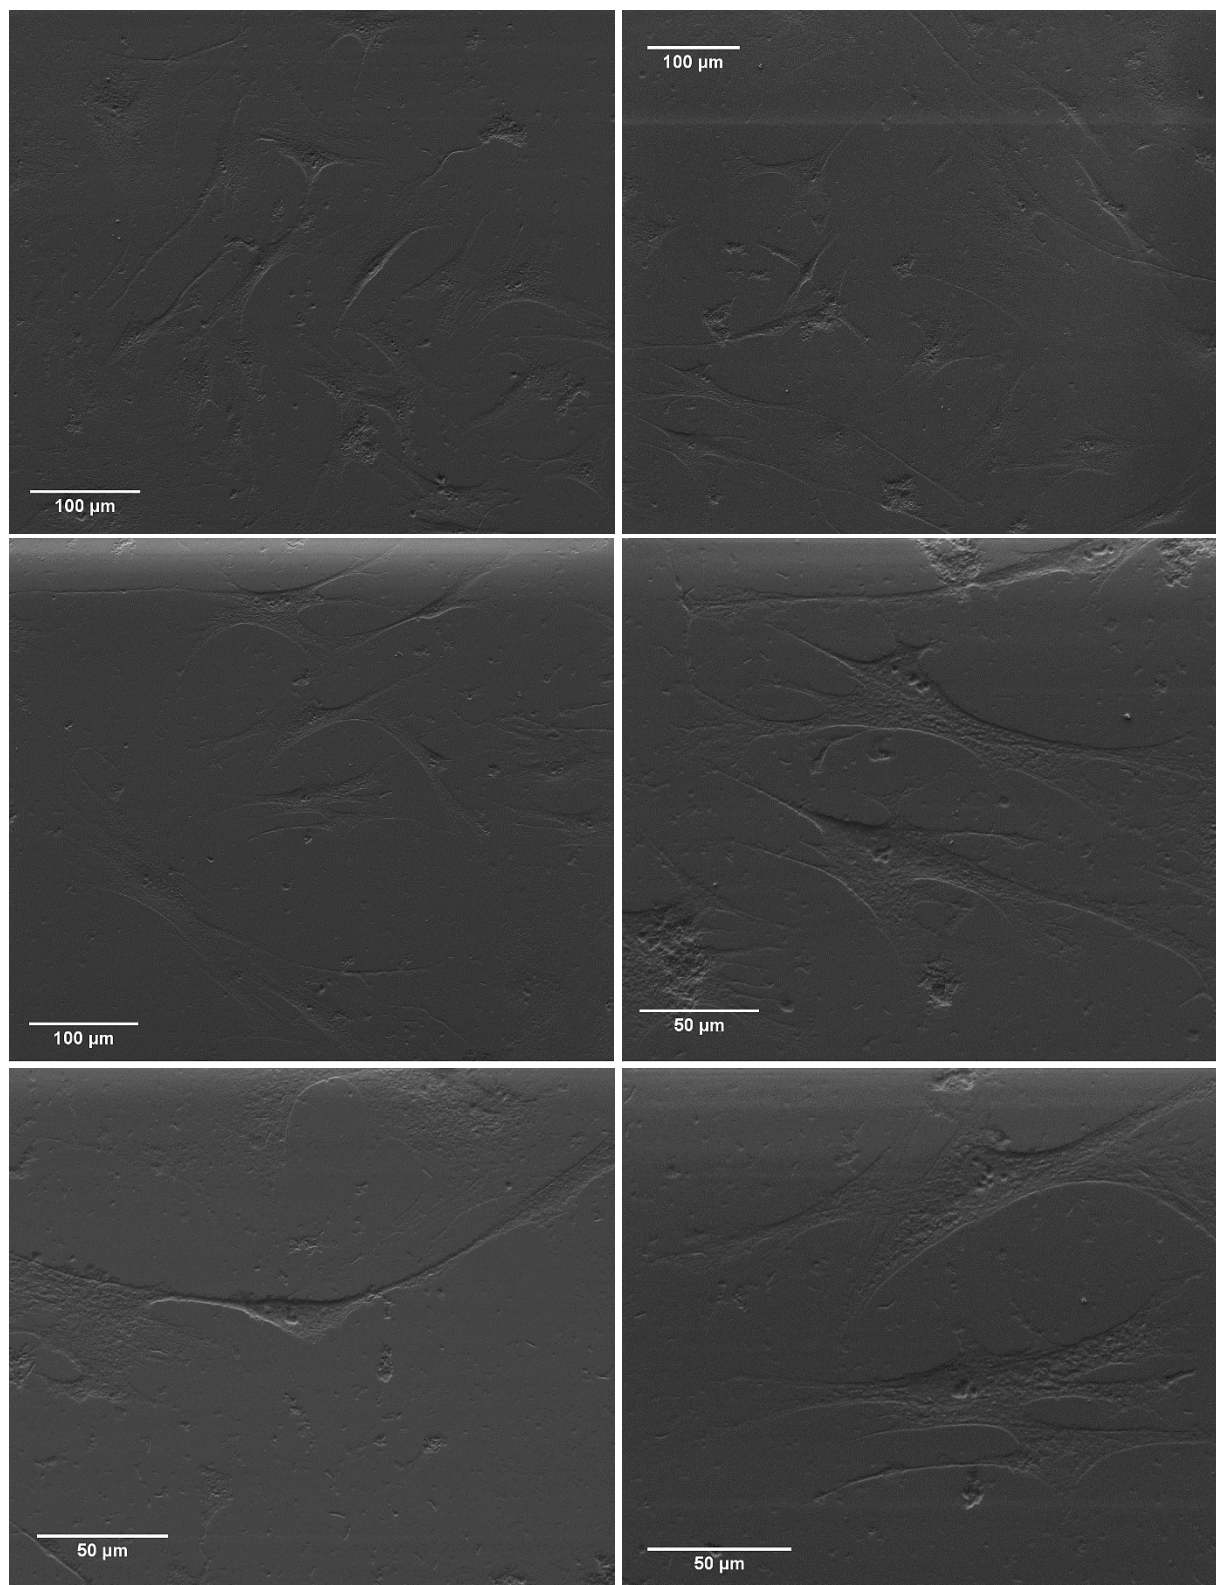

**Figure S1.** SEM images of stem cell-imprinted PDMS substrate

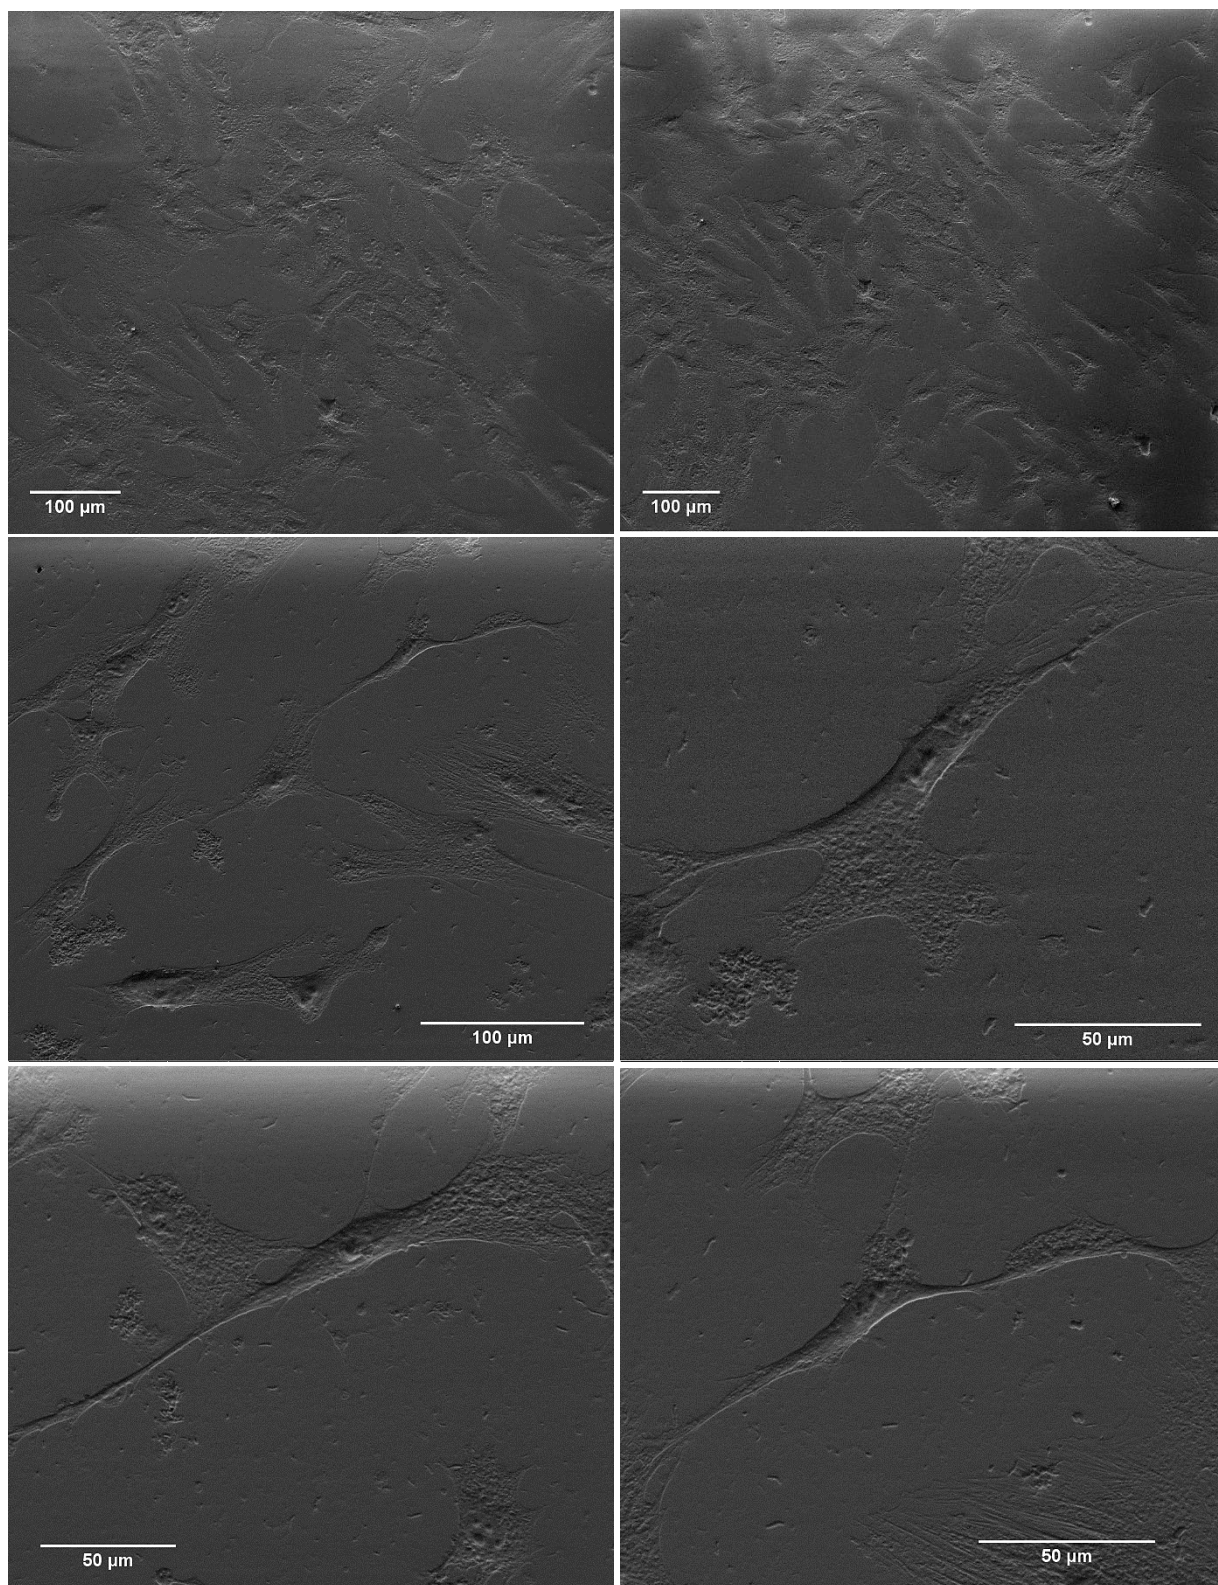

**Figure S2.** SEM images of osteoblast-imprinted PDMS substrate



## S2. Additional AFM Images of the Cell-imprinted PDMS Substrates.

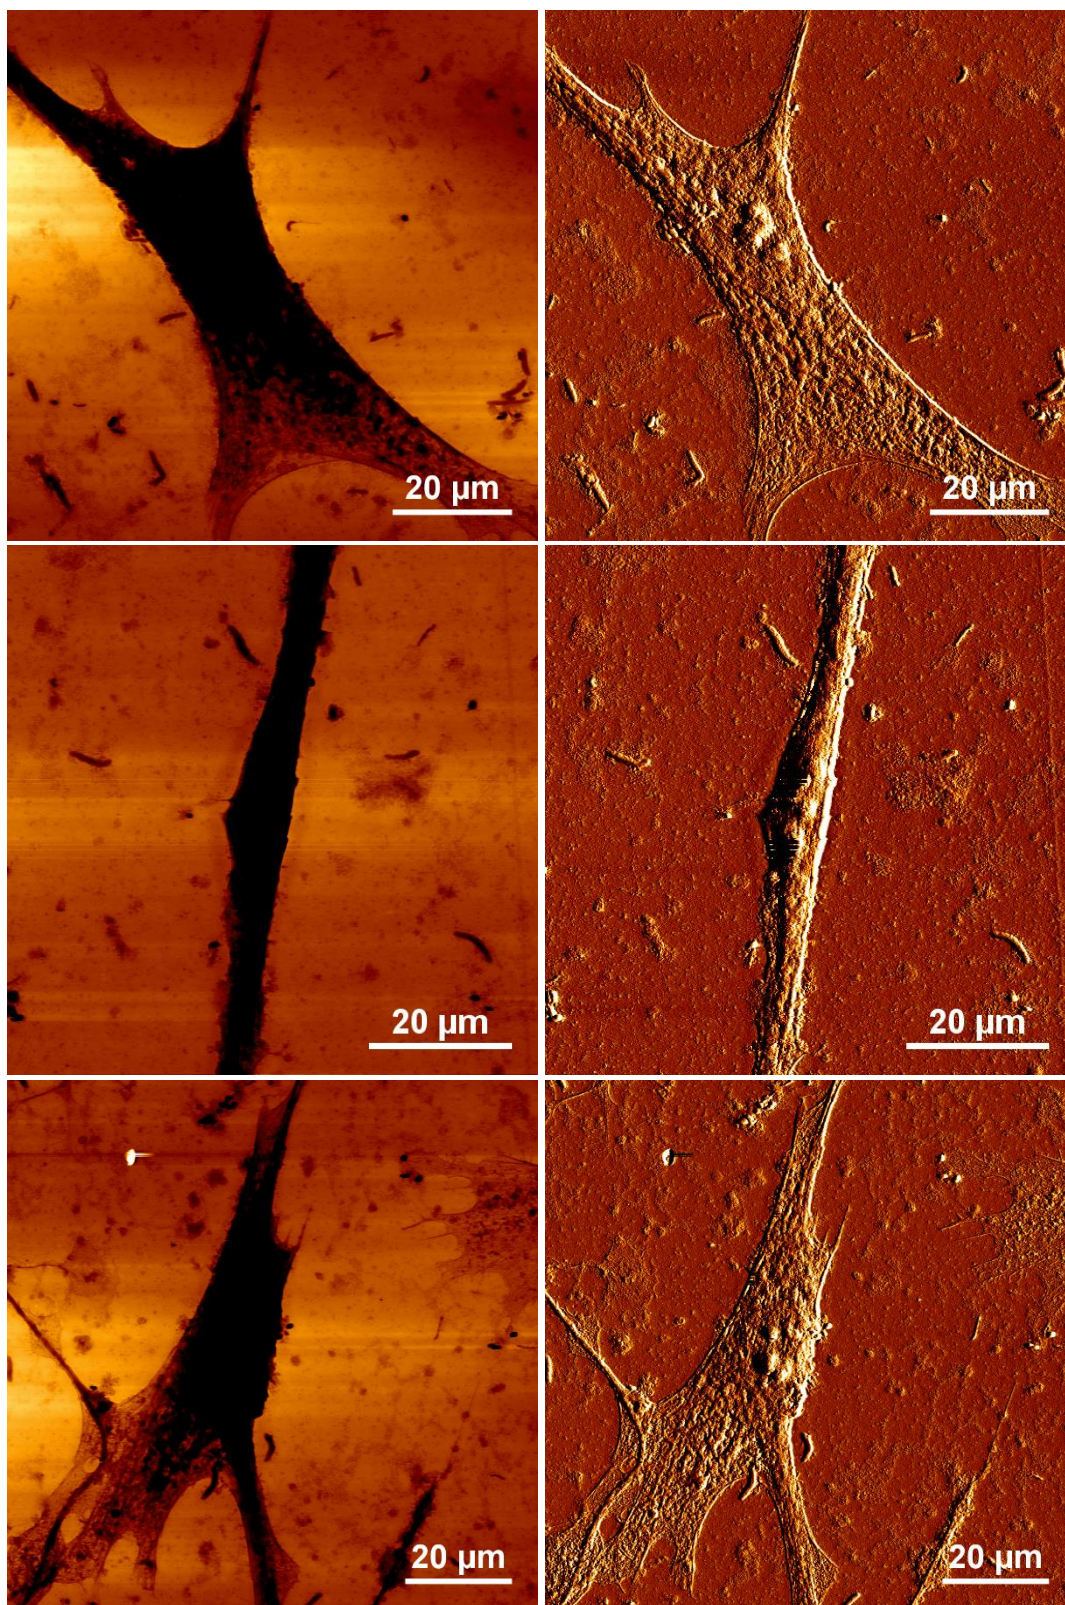

*Figure S3. AFM height (left panel) and vertical deflection (right panel) images of stem cell-imprinted PDMS substrate*



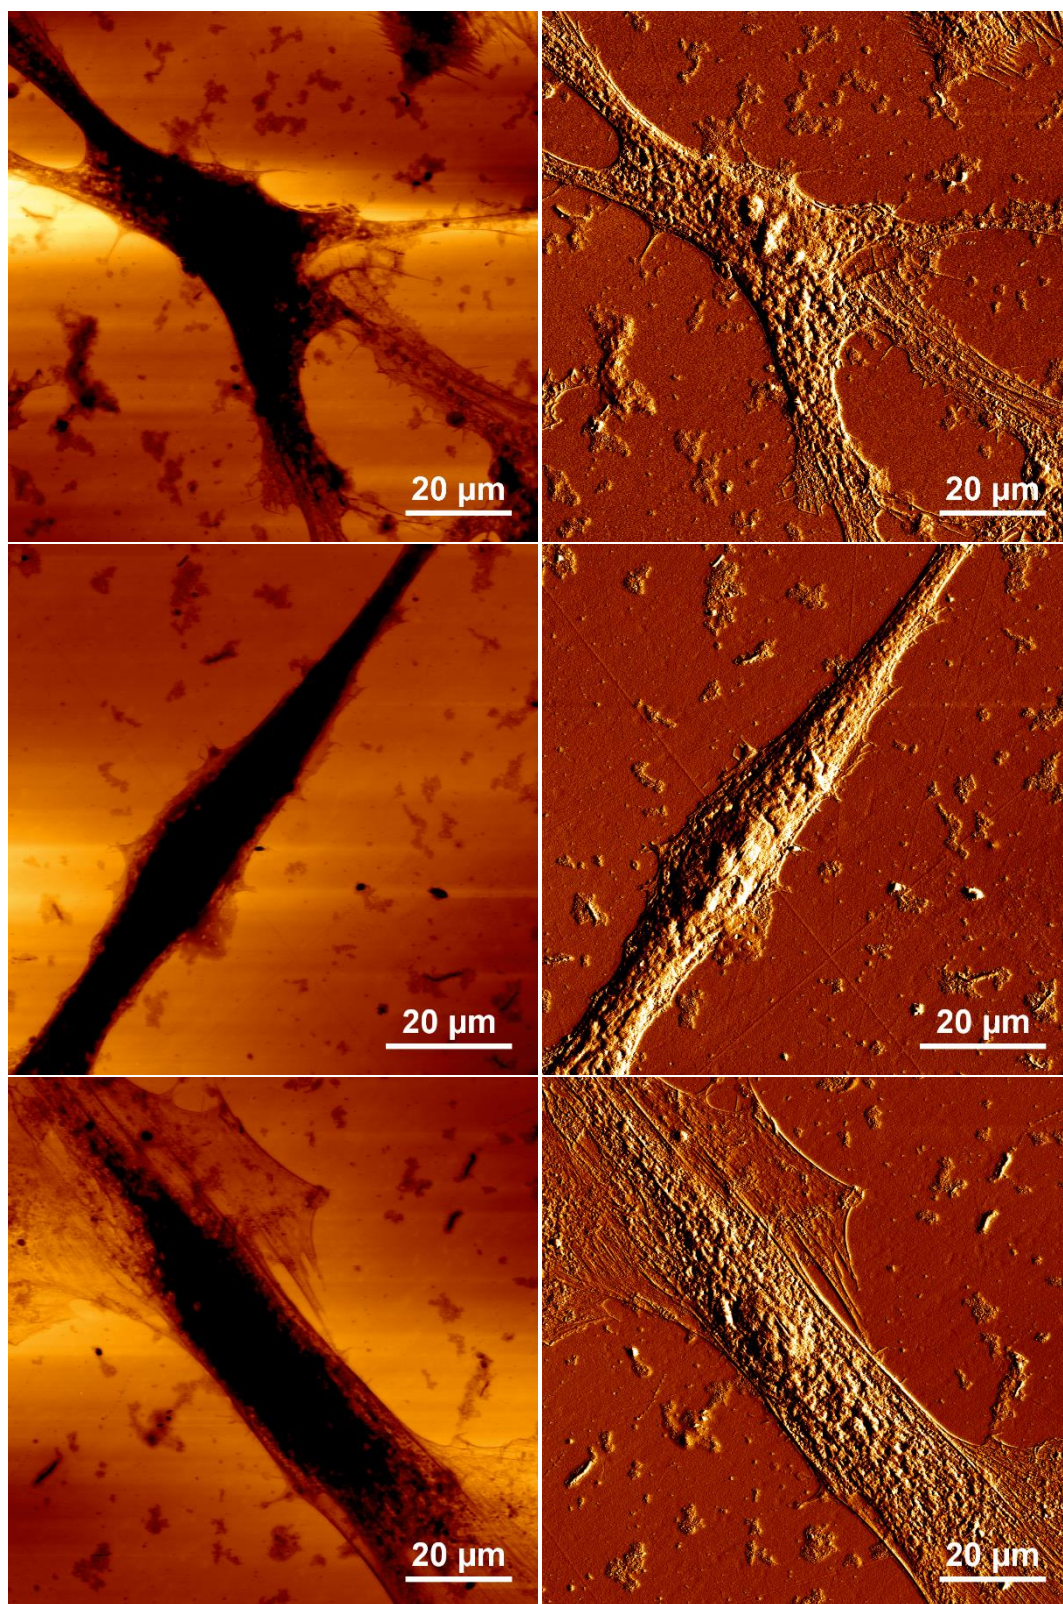

*Figure S4. AFM height (left panel) and vertical deflection (right panel) images of osteoblast-imprinted PDMS substrate*

### S3. SEM Images of the Cell-imprinted PDMS/HA Substrates.

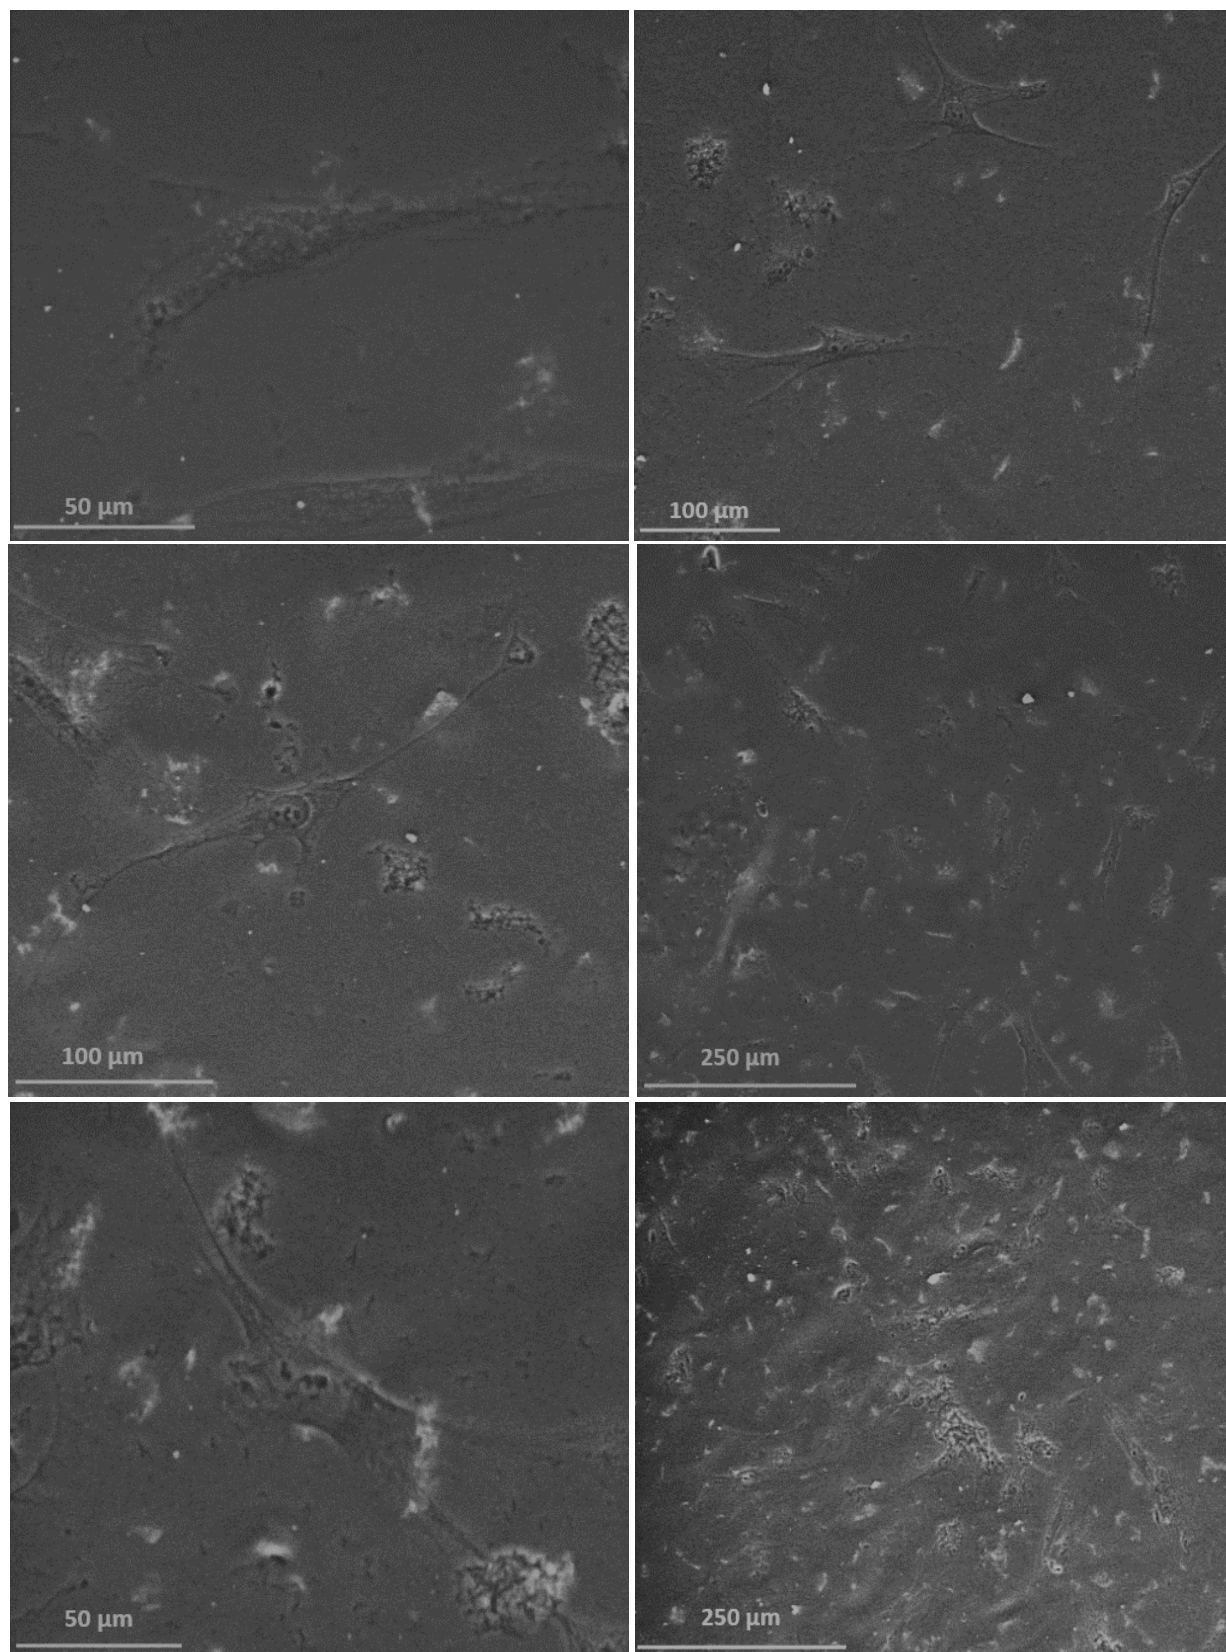

**Figure S5.** SEM images of osteoblast-imprinted PDMS/HA substrates. First row, 1 wt% HA. Second row, 2 wt% HA. Third row, 4 wt% HA.



**S4. EDS Surface Mapping of the Surface of PDMS/HA Nanocomposite Substrates.**

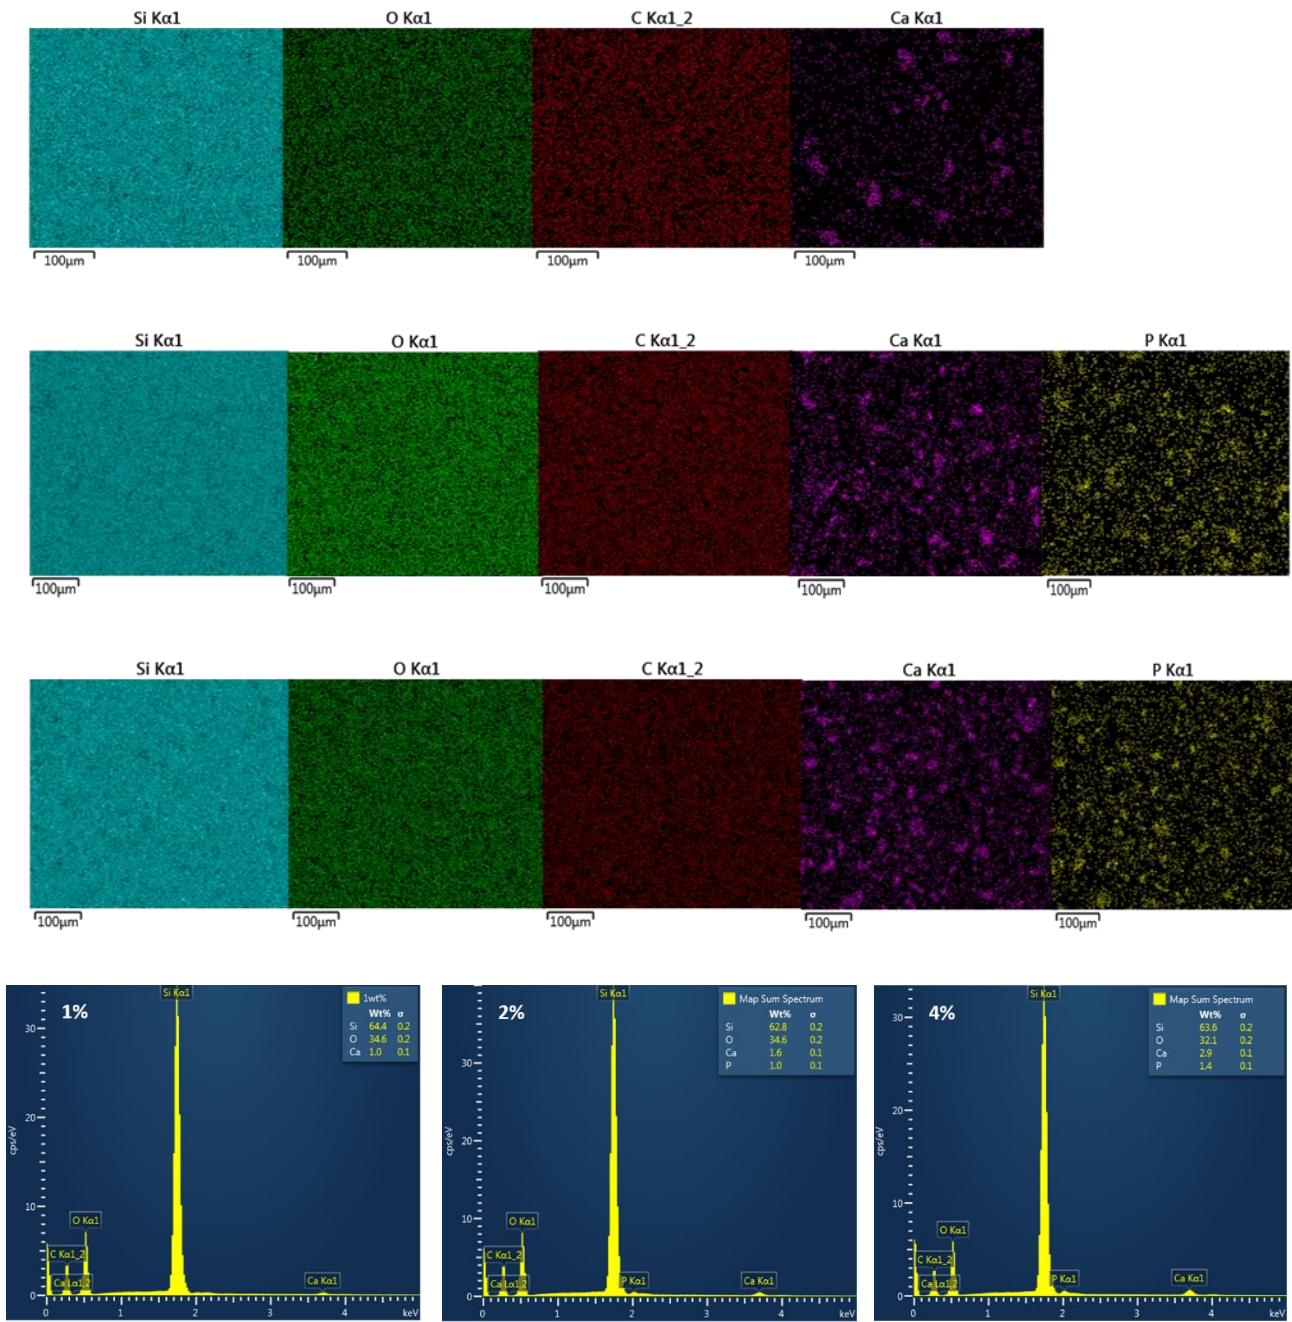

**Figure S6.** EDS surface mapping of PDMS/HA substrates comprising 1 wt%, 2 wt% and 4 wt% HA for Si, O, C, Ca and P elements. First row, 1 wt% HA. Second row, 2 wt% HA. Third row, 4 wt% HA.

**S5. Optical Density Data.**

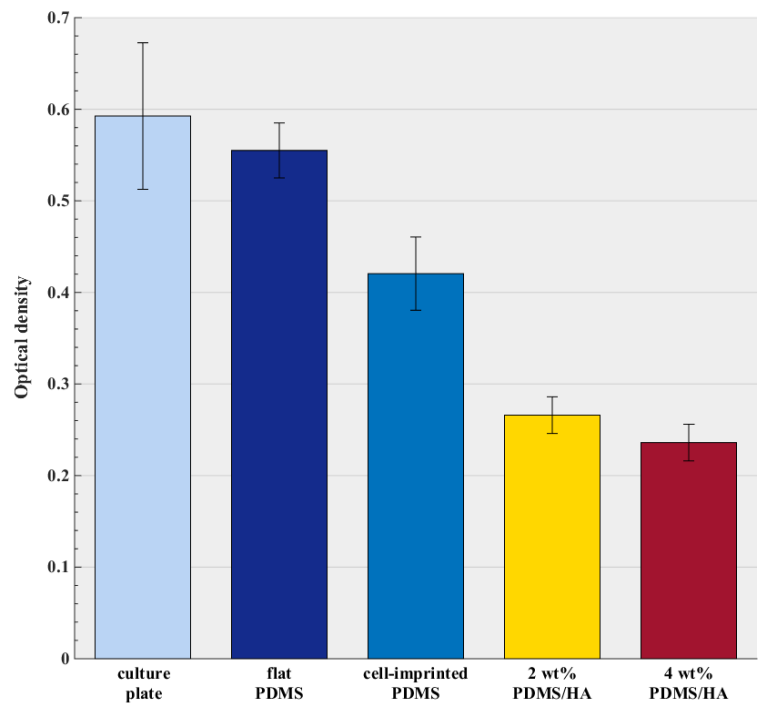

*Figure S7. Optical density of stem cells cultured for 14 days on culture plate, flat PDMS, cell-imprinted PDMS, 2 and 4 wt% cell-imprinted PDMS/HA nanocomposite*

**S6. ALP and Serum Osteocalcin Measurements**

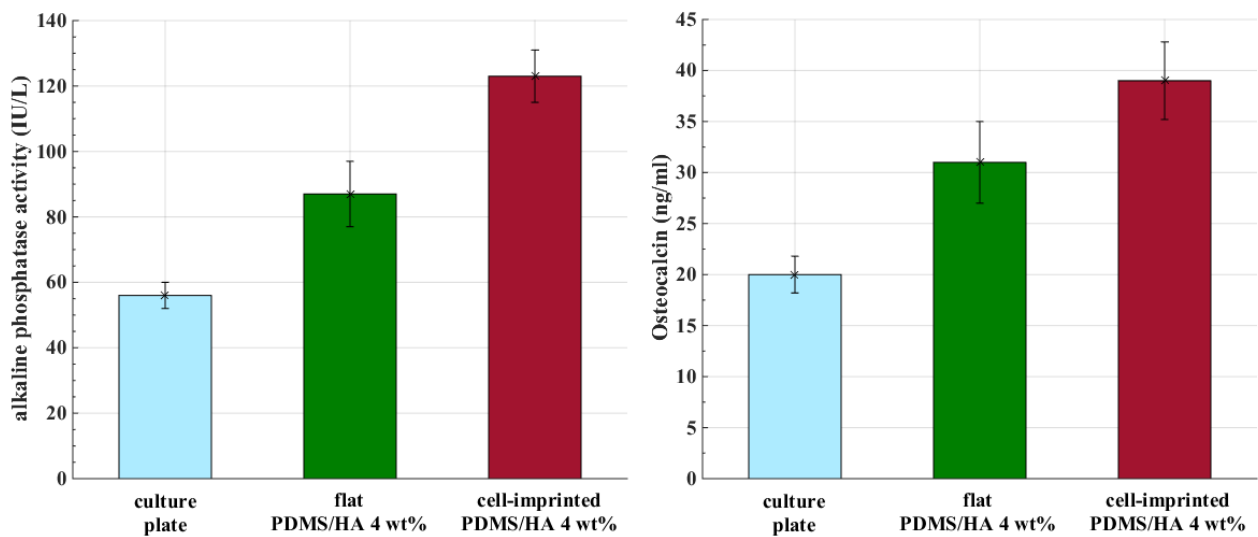

*Figure S8. ALP and Serum Osteocalcin measurements for stem cells cultured on culture plate, flat and osteoblast-imprinted 4 wt% PDMS/HA substrates for 10 days.*
